1 **Article**

2

3 **Phylogenetic evidence for independent origins of GDF1**  
4 **and GDF3 genes in amphibians and mammals**

5

6

7

8

9

10

11

12

**Corresponding author**

13

Juan C. Opazo

14

Instituto de Ciencias Ambientales y Evolutivas

15

Facultad de Ciencias

16

Universidad Austral de Chile

17

Phone: +56 63 2221674

18

Email: [jopazo@gmail.com](mailto:jopazo@gmail.com)

19

20

21

22 **Abstract**

23 Growth differentiation factors 1 (GDF1) and 3 (GDF3) are members of the  
24 transforming growth factor superfamily (TGF- $\beta$ ) that is involved in  
25 fundamental early-developmental processes that are conserved across  
26 vertebrates. The evolutionary history of these genes is still under debate due  
27 to ambiguous definitions of homologous relationships among vertebrates.  
28 Thus, the goal of this study was to unravel the evolution of the GDF1 and  
29 GDF3 genes of vertebrates, emphasizing the understanding of homologous  
30 relationships and their evolutionary origin. Surprisingly, our results revealed  
31 that the GDF1 and GDF3 genes found in amphibians and mammals are the  
32 products of independent duplication events of an ancestral gene in the  
33 ancestor of each of these lineages. The main implication of this result is that  
34 the GDF1 and GDF3 genes of amphibians and mammals are not 1:1  
35 orthologs. In other words, genes that participate in fundamental processes  
36 during early development have been reinvented two independent times during  
37 the evolutionary history of tetrapods.

38

39 **Keywords:** gene duplication; gene family evolution; tetrapods; left-right  
40 identity; development

41

42

43

## 44 Introduction

45 Growth differentiation factors 1 (GDF1) and 3 (GDF3) are members of the  
46 transforming growth factor superfamily (TGF- $\beta$ ) that were originally isolated  
47 from mouse embryonic libraries<sup>1,2</sup>. They perform fundamental roles during  
48 early development, GDF1 has been mainly associated to the regulation of the  
49 left-right patterning, whereas GDF3 is mainly involved in the formation of the  
50 anterior visceral endoderm, mesoderm and the establishment of anterior-  
51 posterior identity of the body<sup>3-20</sup>. Deficiencies in GDF1/GDF3 give rise to a  
52 broad spectrum of defects including right pulmonary isomerism, visceral *situs*  
53 *inversus*, transposition of the great arteries, and cardiac anomalies among  
54 others<sup>17,21-25</sup>. In addition to their developmental roles, GDF1 has been  
55 described as a tumor suppressor gene in gastric cells, counteracting  
56 tumorigenesis by stimulating the SMAD signaling pathway<sup>26</sup>, and GDF3 has  
57 been associated with the regulation of adipose tissue homeostasis and  
58 energy balance during nutrient overload<sup>27-29</sup>.

59 The evolutionary history of the GDF1 and GDF3 genes is still a matter  
60 of debate due to the unclear definition of homologous relationships.  
61 Understanding homology is a fundamental aspect of biology as it allows us to  
62 comprehend the degree of relatedness between genes that are associated to  
63 a given phenotype in a group of organisms. This is particularly important for  
64 GDF1 and GDF3 as these genes perform biological functions during early  
65 stages of development that define key aspects of the body plan of all  
66 vertebrates<sup>3,4,13-20,5-12</sup>. Until now, most of the inferences of the homology  
67 relationships of these genes have been based on functional information. For  
68 example, based on the developmental processes that these genes regulate, it  
69 has been suggested that the mammalian GDF1 gene is the true ortholog of  
70 the Vg1 (GDF1) gene found in amphibians<sup>15,17,21</sup>. Furthermore, phylogenetic  
71 analyses performed by Andersson et al., (2007) were not able to define  
72 orthologous relationships between the GDF1 and GDF3 genes among  
73 vertebrates. However after performing genomic comparisons, these authors  
74 did propose that the GDF1 gene present in mammals is the true ortholog of  
75 the Vg1 (GDF1) gene present in amphibians<sup>30</sup>. It was also suggested that the  
76 GDF3 gene could be an evolutionary innovation of mammals, as Andersson  
77 et al., (2007) did not find GDF3 sequences in the amphibian and bird

78 genomes<sup>30,31</sup>. Given this scenario, the single copy gene found in amphibians  
79 and birds would be a co-ortholog of the mammalian genes<sup>30</sup>. More recently, a  
80 second copy of a GDF gene (derrière) has been annotated at the 3' side of  
81 the Vg1 (GDF1) in the genome of the western clawed frog (*Xenopus*  
82 *tropicalis*), thus further complicating the definition of homologous relationships  
83 and the origin of genes that accomplish fundamental roles during early  
84 development in vertebrates.

85 With emphasis on understanding homologous relationships and their  
86 evolutionary origin, the goal of this study was to unravel the evolution of the  
87 GDF1 and GDF3 genes of vertebrates. Surprisingly, our phylogenetic  
88 analyses revealed that the GDF1 and GDF3 genes of amphibians and  
89 mammals are the products of independent duplication events of an ancestral  
90 gene in the ancestor of each of these groups. We also found the signature of  
91 two chromosomal translocations, the first occurred in the ancestor of  
92 tetrapods whereas the second was found in the ancestor of mammals. Thus,  
93 our results support the hypothesis that in amphibians and mammals,  
94 descendent copies of the same ancestral gene (GDF1/3) have independently  
95 subfunctionalized to perform key developmental functions in vertebrates.

96

## 97 **Results and Discussion**

### 98 ***Phylogenetic analyses suggest an independent origin of the GDF1 and*** 99 ***GDF3 genes in mammals and amphibians***

100 From an evolutionary perspective, the definition of homologous relationships  
101 among GDF1 and GDF3 genes is still a matter of debate<sup>30,31</sup>. The resolution  
102 of this homology is important as these genes are involved in fundamental  
103 developmental processes which are conserved all across vertebrates<sup>8,32-34</sup>.  
104 Thus, if extant species inherited these genes from the vertebrate ancestor, the  
105 developmental processes in which GDF1 and GDF3 are involved have a  
106 single evolutionary origin and are comparable among species.

107 Based on evolutionary analyses and the developmental processes in  
108 which GDF1 has been shown to participate, it has been suggested that GDF1  
109 in mammals, birds, and amphibians are 1:1 orthologs<sup>15,17,21,30,35</sup>. Given that it  
110 has not been possible to identify copies of the GDF3 gene in amphibians and  
111 birds, it has been proposed that this gene is an evolutionary innovation of

112 mammals, and the single gene copy found in amphibians and birds is co-  
113 ortholog to the mammalian duplicates<sup>30</sup>. However, a second copy of a GDF  
114 gene has been annotated in the genome of the western clawed frog (*Xenopus*  
115 *tropicalis*)<sup>36</sup>. This newly described gene is located at the 3' side of the GDF1  
116 gene and indicates that amphibians, like mammals, also have a repertoire of  
117 two GDF genes (GDF1 (Vg1) and GDF3 (derrière)). This new finding further  
118 complicates the resolution of homologous relationships and the origin of  
119 genes involved in the early development of all vertebrates<sup>8,32-34</sup>.

120 Our maximum likelihood and Bayesian reconstructions revealed that  
121 the GDF1 and GDF3 genes of amphibians and mammals were both  
122 reciprocally monophyletic (Fig. 1), indicating that these genes originated  
123 independently in each of these two lineages (Fig. 1). In agreement with the  
124 literature, we found only one gene in sauropsids (e.g. birds, turtles, lizards  
125 and allies), suggesting that they retained the ancestral condition of a single  
126 gene copy as found in non-tetrapod vertebrates (e.g. coelacanths, bony fish,  
127 chondrichthyes and cyclostomes)(Fig. 1). Dot-plot comparisons provided  
128 further support for the presence of a single gene copy in sauropsids as no  
129 traces of an extra GDF gene were present in the syntenic region of  
130 representative species of the group (Fig. 2). However, we cannot rule out an  
131 alternative scenario of duplication and subsequent gene loss in the ancestor  
132 of sauropsids. Thus, our evolutionary analyses suggest that the GDF1 and  
133 GDF3 genes present in amphibians and mammals diversified independently  
134 in the ancestor of each of these lineages. In other words, genes that  
135 participate in fundamental processes during early development have been  
136 reinvented two independent times during the evolutionary history of tetrapods.  
137 As a consequence of the independent origin of these genes in amphibians  
138 and mammals, they are not 1:1 orthologs.

139 To further test our hypothesis of the independent origins of the GDF1  
140 and GDF3 genes in amphibians and mammals we performed topology tests.  
141 In these analyses we compared our phylogenetic tree (Fig. 1 and Fig. 3B) to  
142 the topology predicted from a one-duplication model in which the duplication  
143 event that gave rise to the GDF1 and GDF3 genes in amphibians and  
144 mammals occurred in the ancestor of tetrapods (Fig. 3A). In the one-  
145 duplication model, it is assumed that the ancestor of sauropsids had two gene

146 copies and that subsequently one of these was lost. Thus, according to the  
147 one-duplication model (Fig. 3A), the predicted phylogeny would recover a  
148 monophyletic group containing GDF1 sequences from mammals, sauropsids,  
149 and amphibians sister to a clade containing GDF3 sequences from the same  
150 groups (Fig. 3A). Alternatively, the predicted phylogeny from the two-  
151 duplication model would retrieve a clade containing GDF1 and GDF3  
152 sequences from mammals sister to a clade containing GDF1/3 sequences  
153 from sauropsids; additionally a clade containing GDF1 and GDF3 sequences  
154 from amphibians would be recovered sister to the mammalian/sauropsid clade  
155 (Fig. 3B). Results of the topology tests rejected the phylogeny predicted by  
156 the one-duplication model (Weighted Shimodaira and Hasegawa,  $p < 10^{-4}$ ;  
157 Weighted Kishino Hasegawa,  $p < 10^{-4}$ ). Thus, this result provided additional  
158 support to our hypothesis that the GDF1 and GDF3 genes of amphibians and  
159 mammals are the product of lineage independent duplication events in the  
160 ancestors of each of these groups.

161 In the literature there are other cases of groups of genes that perform  
162 similar biological functions in a diversity of species but that have originated via  
163 lineage independent duplication events<sup>37-43</sup>. Among these, the independent  
164 origin of the  $\beta$ -globin gene cluster in all main groups of tetrapods (e.g. therian  
165 mammals, monotremes, birds, crocodiles, turtles, squamates, amphibians)  
166 represents a well-documented phenomenon<sup>41-43</sup>. This case is of particular  
167 interest as the two  $\beta$ -globin subunits that come from a gene family that has  
168 been reinvented several times during the evolutionary history of tetrapods are  
169 assembled in a tetramer with two  $\alpha$ -globin subunits that belong to a group of  
170 genes that possess a single origin<sup>37,41-43</sup>. Besides this example, the  
171 independent origin of gene families makes the task of comparison difficult, as  
172 the repertoire of genes linked to physiological processes in different lineages  
173 do not have the same evolutionary origin. Additionally, the fact that the  
174 evolutionary process can give rise to similar phenotypes following different  
175 mutational pathways makes the problem of comparing even more difficult  
176 (Natarajan et al., 2016). This is particularly important when extrapolating the  
177 results of physiological studies performed in model species to other  
178 organisms.

179

180 ***Two translocation events during the evolutionary history of the GDF1***  
181 ***and GDF3 genes of tetrapods***

182 Based on the chromosomal distribution of the GDF1 and GDF3 genes and the  
183 conservation pattern of flanking genes, we propose that during the  
184 evolutionary history of tetrapods, these genes underwent two chromosomal  
185 translocation events (Fig. 4). According to our analyses the genomic region  
186 that harbors the single gene copy of chondrichthyes, bony fish, and  
187 coelacanths is conserved, yet this region in these groups differs from the  
188 regions in which GDF1 and GDF3 are located in tetrapods. Overall this  
189 suggests that the first translocation event occurred in the ancestor of  
190 tetrapods (Fig. 4). Interestingly, the genomic region where the single gene  
191 copy is located in non-tetrapod vertebrates, which is defined by the presence  
192 of upstream (BMP2, HAO1, TMX4 and PLCB1) and downstream genes  
193 (FERMT1, LRRN4, CRLS1), is conserved in tetrapods. Given this, it is  
194 possible to identify the chromosomal location where the gene was located in  
195 the tetrapod ancestor before the first translocation event (Fig. 4). On the other  
196 hand, the fact that the mammalian GDF1 and GDF3 genes are located in  
197 different chromosomes suggests that the second translocation event occurred  
198 in the ancestor of the group (Fig. 4). In humans, the GDF1 gene is located on  
199 chromosome 19 while GDF3 is located on chromosome 12. In opossum  
200 (*Didelphis virginiana*) the GDF1 and GDF3 genes are located on  
201 chromosomes 3 and 8, respectively.

202

203 ***Evolution of GDF1 and GDF3 genes in vertebrates***

204 In this study we present compelling evidence suggesting that genes involved  
205 in the formation of the primitive streak, anterior visceral endoderm, mesoderm  
206 and the establishment of the left-right identity<sup>3,4,14–17,20,30,5–7,9–13</sup> in amphibians  
207 and mammals are the product of independent duplications events. As such,  
208 these results indicate that the GDF1 and GDF3 genes of amphibians and  
209 mammals are not 1:1 orthologs.

210 Thus, according to our results the last common ancestor of vertebrates  
211 had a repertoire of one gene (GDF1/3), and this condition is maintained in  
212 actual species of cylostomes, chondrichthyes, bony fish, and coelacanths (Fig.  
213 5). In the ancestor of tetrapods, the single gene copy was translocated from a

214 chromosomal region defined by the presence of the BMP2, HAO1, TMX4,  
215 PLCB1, FERMT1, LRRN4, CRLS1 genes to a chromosomal region defined by  
216 the presence of the CERS1, COPE, DDX49 and HOMER3 genes (Fig. 4).  
217 After this translocation, the ancestral gene underwent a duplication event in  
218 the amphibian ancestor, giving rise to the GDF1 (Vg1) and GDF3 (derrière)  
219 genes as they are found in actual species. In the case of the western clawed  
220 frog (*Xenopus tropicalis*) these genes are located in tandem on chromosome  
221 28 (Fig. 4). Sauropsids, the group that includes birds, crocodiles, turtles,  
222 lizards and snakes, inherited the ancestral condition of a single gene copy as  
223 is seen in non-tetrapod vertebrates (Fig. 5). Finally, in the ancestor of  
224 mammals, the ancestral gene also underwent a duplication event, giving rise  
225 to the GDF1 and GDF3 genes found in extant species of mammals. After  
226 duplication but before the radiation of the group, a second translocation event  
227 occurred in the ancestor of the group (Fig. 5). Thus, all mammals inherited a  
228 repertoire of two genes (GDF1 and GDF3) that are located on two  
229 chromosomes.

230

### 231 **Concluding remarks**

232 This study provides a comprehensive evolutionary analysis of the GDF1 and  
233 GDF3 genes in representative species of all main groups of vertebrates. The  
234 main focus of this study was to unravel the duplicative history of the GDF1  
235 and GDF3 genes and to understand homologous relationships among  
236 vertebrates. Understanding homology in this case is particularly important as  
237 these genes perform fundamental roles during early development that are  
238 conserved across vertebrates<sup>8,32-34</sup>. Surprisingly, our results revealed that the  
239 GDF1 and GDF3 genes present in amphibians and mammals are the product  
240 of independent duplication events in the ancestor of each of these groups.  
241 Subsequently, the GDF1 and GDF3 genes of amphibians and mammals are  
242 not 1:1 orthologs. Our results also show that all other vertebrate groups - i.e  
243 non-tetrapods and sauropsids – maintained the ancestral condition of a single  
244 gene copy (GDF1/3).

245 From an evolutionary perspective the independent duplication events  
246 that occurred in the ancestors of mammals and amphibians could have  
247 resulted in the division of labor, with some degree of redundancy, of the



248 function performed by the ancestral gene. In support of this idea, it has been  
249 shown that the GDF1 and GDF3 genes of mammals have partially redundant  
250 functions during development where GDF1 can to some degree compensate  
251 for the lack of GDF3<sup>30</sup>. Additionally, it has also been shown that double  
252 knockout animals (GDF1<sup>-/-</sup> and GDF3<sup>-/-</sup>) present more severe phenotypes  
253 than those of either single knockout (GDF1<sup>-/-</sup> or GDF3<sup>-/-</sup>)<sup>30</sup>. Detailed  
254 comparisons of the developmental roles of the GDF1 and GDF3 genes  
255 between mammals and amphibians will shed light regarding the reinvention of  
256 genes that possess fundamental roles during early development. On the other  
257 hand, comparing mammals and amphibians with sauropsids will provide  
258 useful information regarding the evolutionary fate of duplicated genes. Finally,  
259 it would be interesting to study the evolutionary history of genes that  
260 cooperate with GDF1 and GDF3 during early development (e.g. nodal)<sup>8,33,44</sup>  
261 in order to understand the evolutionary nature of the entire developmental  
262 network.

263

## 264 **Material and Methods**

### 265 **DNA sequences and phylogenetic analyses**

266 We annotated GDF1 and GDF3 genes in representative species of chordates.  
267 Our study included representative species from mammals, birds, reptiles,  
268 amphibians, coelacanths, holostean fish, teleost fish, cartilaginous fish,  
269 cyclostomes, urochordates and cephalochordates (Supplementary dataset 1  
270 and 2). We identified genomic pieces containing GDF 1 and GDF3 genes in  
271 the Ensembl database using BLASTN with default settings or NCBI database  
272 (refseq\_genomes, htgs, and wgs) using tbalstn (Altschul et al., 1990) with  
273 default settings. Conserved synteny was also used as a criterion to define the  
274 genomic region containing GDF1 and GDF3 genes. Once identified, genomic  
275 pieces were extracted including the 5' and 3' flanking genes. After extraction,  
276 we curated the existing annotation by comparing known exon sequences to  
277 genomic pieces using the program Blast2seq with default parameters  
278 (Tatusova and Madden 1999). Putatively functional genes were characterized  
279 by an open intact reading frame with the canonical exon/intron structure  
280 typical of vertebrate GDF1 and GDF3 genes. Sequences derived from shorter  
281 records based on genomic DNA or cDNA were also included in order to attain

282 a broad and balanced taxonomic coverage. Amino acid sequences were  
283 aligned using the L-INS-i strategy from MAFFT v.7<sup>45</sup> (Supplementary Dataset  
284 3). Phylogenetic relationships were estimated using maximum likelihood and  
285 Bayesian approaches. We used the proposed model tool from IQ-Tree<sup>46</sup> to  
286 select the best-fitting model (JTT+F+R5). Maximum likelihood analysis was  
287 also performed in IQ-Tree<sup>46</sup> to obtain the best tree. Node support was  
288 assessed with 1000 bootstrap pseudoreplicates using the ultrafast routine.  
289 Bayesian searches were conducted in MrBayes v.3.1.2<sup>47</sup>. Two independent  
290 runs of six simultaneous chains for 10x10<sup>6</sup> generations were set, and every  
291 2,500 generations were sampled using default priors. The run was considered  
292 to have reached convergence once the likelihood scores formed an  
293 asymptote and the average standard deviation of the split frequencies  
294 remained < 0.01. We discarded all trees that were sampled before  
295 convergence, and we evaluated support for the nodes and parameter  
296 estimates from a majority rule consensus of the last 2,000 trees. Sea squirt  
297 (*Ciona intestinalis*) and Florida lancelet (*Branchiostoma floridae*) BMP2  
298 sequences were used as outgroups.

299

### 300 **Assessment of conserved synteny**

301 We examined genes found up- and downstream of GDF1 and GDF3 in  
302 species representative of vertebrates. Synteny assessment were conducted  
303 for human (*Homo sapiens*), chicken (*Gallus gallus*), western-clawed frog  
304 (*Xenopus tropicalis*), coelacanth (*Latimeria chalumnae*), spotted gar  
305 (*Lepisosteus oculatus*), elephant shark (*Callorhynchus milii*) and sea lamprey  
306 (*Petromyzon marinus*). Initial ortholog predictions were derived from the  
307 EnsemblCompara database<sup>48</sup> and were visualized using the program  
308 Genomicus v91.01<sup>49</sup>. In other cases, the genome data viewer platform from  
309 the National Center for Biotechnology information was used.

310

### 311 **Acknowledgements**

312 This work was supported by the Fondo Nacional de Desarrollo Científico y  
313 Tecnológico (FONDECYT 1160627) grant to JCO.

314

315

316

317

318

319

320 **Figure legends**

321

322 **Figure 1.** Maximum likelihood tree depicting evolutionary relationships among  
323 the GDF1 and GDF3 genes of chordates. Numbers on the nodes represent  
324 maximum likelihood ultrafast bootstrap and Bayesian posterior probability  
325 support values. BMP2 sequences from urochordates (*Ciona intestinalis*) and  
326 cephalochordates (*Branchiostoma floridae*) were used as outgroups.

327

328 **Figure 2.** Dot-plots of pairwise sequence similarity between the GDF1 and  
329 GDF3 genes of the western clawed frog (*Xenopus tropicalis*) and the  
330 corresponding syntenic region in the American alligator (*Alligator*  
331 *mississippiensis*), Burmese python (*Python bivittatus*), chicken (*Gallus gallus*)  
332 and green turtle (*Chelonia mydas*).

333

334 **Figure 3.** Schematic representations of alternative hypotheses of the sister  
335 group relationships among duplicated GDF genes in tetrapods. A) According  
336 to the one-duplication model the predicted phylogeny recovers a monophyletic  
337 group containing GDF1 sequences from mammals, sauropsids and  
338 amphibians sister to a clade containing GDF3 sequences from the same  
339 groups. B) The phylogenetic prediction from the two-duplication model  
340 retrieves a clade containing GDF1 and GDF3 sequences from mammals  
341 sister to a clade containing GDF1/3 sequences from sauropsids; additionally a  
342 clade containing GDF1 and GDF3 sequences from amphibians is recovered  
343 sister to the mammalian/sauropsid clade.

344

345 **Figure 4.** Structure of the chromosomal region containing the GDF1 and  
346 GDF3 genes of vertebrates. Asterisks denote that the orientation of the  
347 genomic piece is from 3' to 5', gray lines represent intervening genes that do  
348 not contribute to conserved synteny.

349

350 **Figure 5.** An evolutionary hypothesis of the evolution of the GDF1 and GDF3  
351 genes in vertebrates. According to this model the last common ancestor of  
352 vertebrates had a repertoire of one gene (GDF1/3), a condition that has been  
353 maintained in actual species of cyclostomes, chondrichthyes, bony fish,

354 coelacanths and sauropsids. In the ancestor of tetrapods, the single gene  
355 copy was translocated to a different chromosomal location. After that, in the  
356 amphibian ancestor, the single gene copy underwent a duplication event  
357 giving rise to the amphibian GDF1 (Vg1) and GDF3 (derrière) genes. In the  
358 ancestor of mammals, the single gene copy also underwent a duplication  
359 event, giving rise to the mammalian GDF1 and GDF3 genes. After the  
360 duplication, but before the radiation of the group, a second translocation event  
361 occurred in the ancestor of the group. Thus, all mammals inherited a  
362 repertoire of two genes (GDF1 and GDF3) that were located on two  
363 chromosomes.  
364

365 **References**

366

367

- 368 1. Lee, S.-J. Identification of a Novel Member (GDF-1) of the Transforming  
369 Growth Factor-beta Superfamily. *Mol. Endocrinol.* **4**, 1034–1040 (1990).
- 370 2. Jones, C. M., Simon-Chazottes, D., Guenet, J.-L., Hogan, B. L. M. &  
371 Pasteur, L. Isolation of Vgr-2, a Novel Member of the Transforming  
372 Growth Factor-P- Related Gene Family. *Mol. Endocrinol.* **6**, 1961–1968  
373 (1992).
- 374 3. Lee, S.-J. Expression of growth/differentiation factor 1 in the nervous  
375 system: Conservation of a bicistronic structure. *Biochemistry* **88**, 4250–  
376 4254 (1991).
- 377 4. Dale ', L., Matthews, G. & Colman<sup>2</sup>, A. Secretion and mesoderm-  
378 inducing activity of the TGF-j-related domain of Xenopus Vgl. *EMBO J.*  
379 **12**, 4471–4480 (1993).
- 380 5. Chen, C. The Vg1-related protein Gdf3 acts in a Nodal signaling  
381 pathway in the pre-gastrulation mouse embryo. *Development* **133**, 319–  
382 329 (2006).
- 383 6. Andersson, O., Reissmann, E., Jörnvall, H. & Ibáñez, C. F. Synergistic  
384 interaction between Gdf1 and Nodal during anterior axis development.  
385 *Dev. Biol.* **293**, 370–381 (2006).
- 386 7. Bengtsson, H. *et al.* Generation and characterization of a Gdf1  
387 conditional null allele. *Genesis* **46**, 368–372 (2008).
- 388 8. Komatsu, Y. & Mishina, Y. Establishment of left – right asymmetry in  
389 vertebrate development : the node in mouse embryos. *Cell. Mol. Life*  
390 *Sci.* **70**, 4659–4666 (2013).
- 391 9. Arias, C. F., Herrero, M. A., Stern, C. D. & Bertocchini, F. A molecular  
392 mechanism of symmetry breaking in the early chick embryo. *Scientific*  
393 *Reports* **7**, 1–6 (2017).
- 394 10. Bisgrove, B. W., Su, Y.-C. & Yost, H. J. Maternal Gdf3 is an obligatory  
395 cofactor in Nodal signaling for embryonic axis formation in zebrafish.  
396 *Elife* **6**, e28534 (2017).
- 397 11. Montague, T. G. & Schier, A. F. Vg1-Nodal heterodimers are the  
398 endogenous inducers of mesendoderm. *Elife* **6**, e28183 (2017).

- 399 12. Pelliccia J.L., Jindal, G. A. & Burdine, R. D. Gdf3 is required for robust  
400 Nodal signaling during germ layer formation and left-right patterning.  
401 *Elife* **6**, e28635 (2017).
- 402 13. Thomsen, G. H. & Melton, D. A. Processed Vg1 protein is an axial  
403 mesoderm inducer in xenopus. *Cell* **74**, 433–441 (1993).
- 404 14. Hyatt, B. A., Lohr, J. L. & Yost, H. J. Initiation of vertebrate left–right  
405 axis formation by maternal Vg1. *Nature* **384**, 62–65 (1996).
- 406 15. Hyatt, B. A. & Yost, H. J. The left-right coordinator: The role of Vg1 in  
407 organizing left-right axis formation. *Cell* **93**, 37–46 (1998).
- 408 16. Söderström, S. & Ebendal, T. Localized expression of BMP and GDF  
409 mRNA in the rodent brain. *J. Neurosci. Res.* **56**, 482–492 (1999).
- 410 17. Rankin, C. T., Bunton, T., Lawler, A. M. & Lee, S. J. Regulation of left-  
411 right patterning in mice by growth/differentiation factor-1. *Nat. Genet.*  
412 **24**, 262–265 (2000).
- 413 18. Wright, C. V. E. Mechanisms of Left-Right Asymmetry : What ' s Right  
414 and What ' s Left ? A recent meeting at the Juan March Foundation in.  
415 *Cell* **1**, 179–186 (2001).
- 416 19. Hamada, H., Meno, C., Watanabe, D. & Saijoh, Y. Establishment of  
417 vertebrate left-right asymmetry. *Nat. Rev. Genet.* **3**, 103–113 (2002).
- 418 20. Somi, S., Houweling, A. C., Buffing, A. A. M., Moorman, A. F. M. & Van  
419 Den Hoff, M. J. B. Expression of cVg1 mRNA during chicken embryonic  
420 development. *Anat. Rec.* **273A**, 603–608 (2003).
- 421 21. Wall, N. A., Craig, E. J., Labosky, P. A. & Kessler, D. S. Mesendoderm  
422 induction and reversal of left-right pattern by mouse Gdf1, a Vg1-related  
423 gene. *Dev. Biol.* **227**, 495–509 (2000).
- 424 22. Karkera, J. D. *et al.* Loss-of-Function Mutations in Growth Differentiation  
425 Factor-1 (GDF1) Are Associated with Congenital Heart Defects in  
426 Humans. *Am. J. Hum. Genet.* **81**, 987–994 (2007).
- 427 23. Kaasinen, E. *et al.* Recessively inherited right atrial isomerism caused  
428 by mutations in growth/differentiation factor 1 (GDF1). *Hum. Mol. Genet.*  
429 **19**, 2747–2753 (2010).
- 430 24. Bao, M. W. *et al.* Cardioprotective role of growth/differentiation factor 1  
431 in post-infarction left ventricular remodelling and dysfunction. *J. Pathol.*  
432 **236**, 360–372 (2015).

- 433 25. Zhang, J. *et al.* Association of GDF1 rs4808863 with fetal congenital  
434 heart defects: A case-control study. *BMJ Open* **5**, e009352 (2015).
- 435 26. Yang, W. *et al.* Epigenetic silencing of GDF1 disrupts SMAD signaling  
436 to reinforce gastric cancer development. *Oncogene* **35**, 2133–2144  
437 (2016).
- 438 27. Witthuhn, B. A. & Bernlohr, D. A. Upregulation of bone morphogenetic  
439 protein GDF-3/Vgr-2 expression in adipose tissue of FABP4/aP2 null  
440 mice. *Cytokine* **14**, 129–135 (2001).
- 441 28. Wang, W., Yang, Y., Meng, Y. & Shi, Y. GDF-3 is an adipogenic  
442 cytokine under high fat dietary condition. *Biochem. Biophys. Res.*  
443 *Commun.* **321**, 1024–1031 (2004).
- 444 29. Andersson, O. *et al.* Growth/differentiation factor 3 signals through  
445 ALK7 and regulates accumulation of adipose tissue and diet-induced  
446 obesity. *Proc. Natl. Acad. Sci. USA* **105**, 7252–7256 (2008).
- 447 30. Andersson, O., Bertolino, P. & Ibáñez, C. F. Distinct and cooperative  
448 roles of mammalian Vg1 homologs GDF1 and GDF3 during early  
449 embryonic development. *Dev. Biol.* **311**, 500–511 (2007).
- 450 31. Levine, A. J., Brivanlou, A. H., Suzuki, A. & Hemmati-Brivanlou, A.  
451 GDF3, a BMP inhibitor, regulates cell fate in stem cells and early  
452 embryos. *Development* **133**, 209–16 (2006).
- 453 32. Mercola, M. & Levin, M. Left-right assymetry determination in  
454 vertebrates. *Annu. Rev. Cell Dev. Biol.* **17**, 779–805 (2001).
- 455 33. Levine, A. J. GDF3, a BMP inhibitor, regulates cell fate in stem cells and  
456 early embryos. *Development* **133**, 209–216 (2005).
- 457 34. Nakamura, T. & Hamada, H. Left-right patterning: conserved and  
458 divergent mechanisms. *Development* **139**, 3262 (2012).
- 459 35. Seleiro, E. A. P., Connolly, D. J. & Cooke, J. Early developmental  
460 expression and experimental axis determination by the chicken Vg1  
461 gene. *Curr. Biol.* **6**, 1476–1486 (1996).
- 462 36. Suzuki, A. *et al.* Genome organization of the vg1 and nodal3 gene  
463 clusters in the allotetraploid frog *Xenopus laevis*. *Dev. Biol.* (2017).  
464 doi:10.1016/j.ydbio.2016.04.014
- 465 37. Goodman, M., Czelusniak, J., Koop, B. F., Tagle, D. A. & Slightom, J. L.  
466 Globins: a case study in molecular phylogeny. *Cold Spring Harb. Symp.*



- 467 *Quant. Biol.* **52**, 875–90 (1987).
- 468 38. Kriener, K., O ’huigin, C. & Klein, J. Independent Origin of Functional  
469 MHC Class II Genes in Humans and New World Monkeys. *Hum.*  
470 *Immunol.* **62**, 1–14 (2001).
- 471 39. Wallis, O. C. & Wallis, M. Characterisation of the GH gene cluster in a  
472 new-world monkey, the marmoset (*Callithrix jacchus*). *J. Mol.*  
473 *Endocrinol.* **29**, 89–97 (2002).
- 474 40. Li, Y. *et al.* Independent origin of the growth hormone gene family in  
475 New World monkeys and Old World monkeys/hominoids. *J. Mol.*  
476 *Endocrinol.* **35**, 399–409 (2005).
- 477 41. Opazo, J. C., Hoffmann, F. G. & Storz, J. F. Genomic evidence for  
478 independent origins of  $\gamma_{NL}$ -like globin genes in monotremes and therian  
479 mammals. *Proc. Natl. Acad. Sci. USA* **105**, 1590–1595 (2008).
- 480 42. Hoffmann, F. G., Storz, J. F., Gorr, T. A. & Opazo, J. C. Lineage-  
481 specific patterns of functional diversification in the  $\alpha$ - and  $\beta$ -globin gene  
482 families of tetrapod vertebrates. *Mol. Biol. Evol.* **27**, 1126–1138 (2010).
- 483 43. Hoffmann, F. G., Vandewege, M. W., Storz, J. F. & Opazo, J. C. Gene  
484 Turnover and Diversification of the  $\alpha$ - and  $\beta$ -Globin Gene Families in  
485 Sauropsid Vertebrates. *Genome Biol. Evol.* **10**, 344–358 (2018).
- 486 44. Ramsdell, A. F. & Yost, H. J. Molecular mechanisms of vertebrate left–  
487 right development. *Trends Genet.* **14**, 459–465 (1998).
- 488 45. Katoh, K. & Standley, D. M. MAFFT Multiple Sequence Alignment  
489 Software Version 7: Improvements in Performance and Usability. *Mol.*  
490 *Biol. Evol.* **30**, 772–780 (2013).
- 491 46. Trifinopoulos, J., Nguyen, L.-T., von Haeseler, A. & Minh, B. Q. W-IQ-  
492 TREE: a fast online phylogenetic tool for maximum likelihood analysis.  
493 *Nucleic Acids Res.* **44**, W232–W235 (2016).
- 494 47. Ronquist, F. & Huelsenbeck, J. P. MrBayes 3: Bayesian phylogenetic  
495 inference under mixed models. *Bioinformatics* **19**, 1572–4 (2003).
- 496 48. Herrero, J. *et al.* Ensembl comparative genomics resources. *Database*  
497 **2016**, baw053 (2016).
- 498 49. Louis, A., Nguyen, N. T. T., Muffato, M. & Roest Crolius, H. Genomicus  
499 update 2015: KaryoView and MatrixView provide a genome-wide

500 perspective to multispecies comparative genomics. *Nucleic Acids Res.*  
501 **43**, D682–D689 (2015).

502

503

504

505 **Contributions**

506 Designed the research: JCO; carried out the research: JCO and KZ;

507 contributed materials/reagents/analysis tools: JCO; wrote the paper: JCO

508 **Additional information**

509

510 **Competing interests**

511 The authors declare no competing interests.

512

513

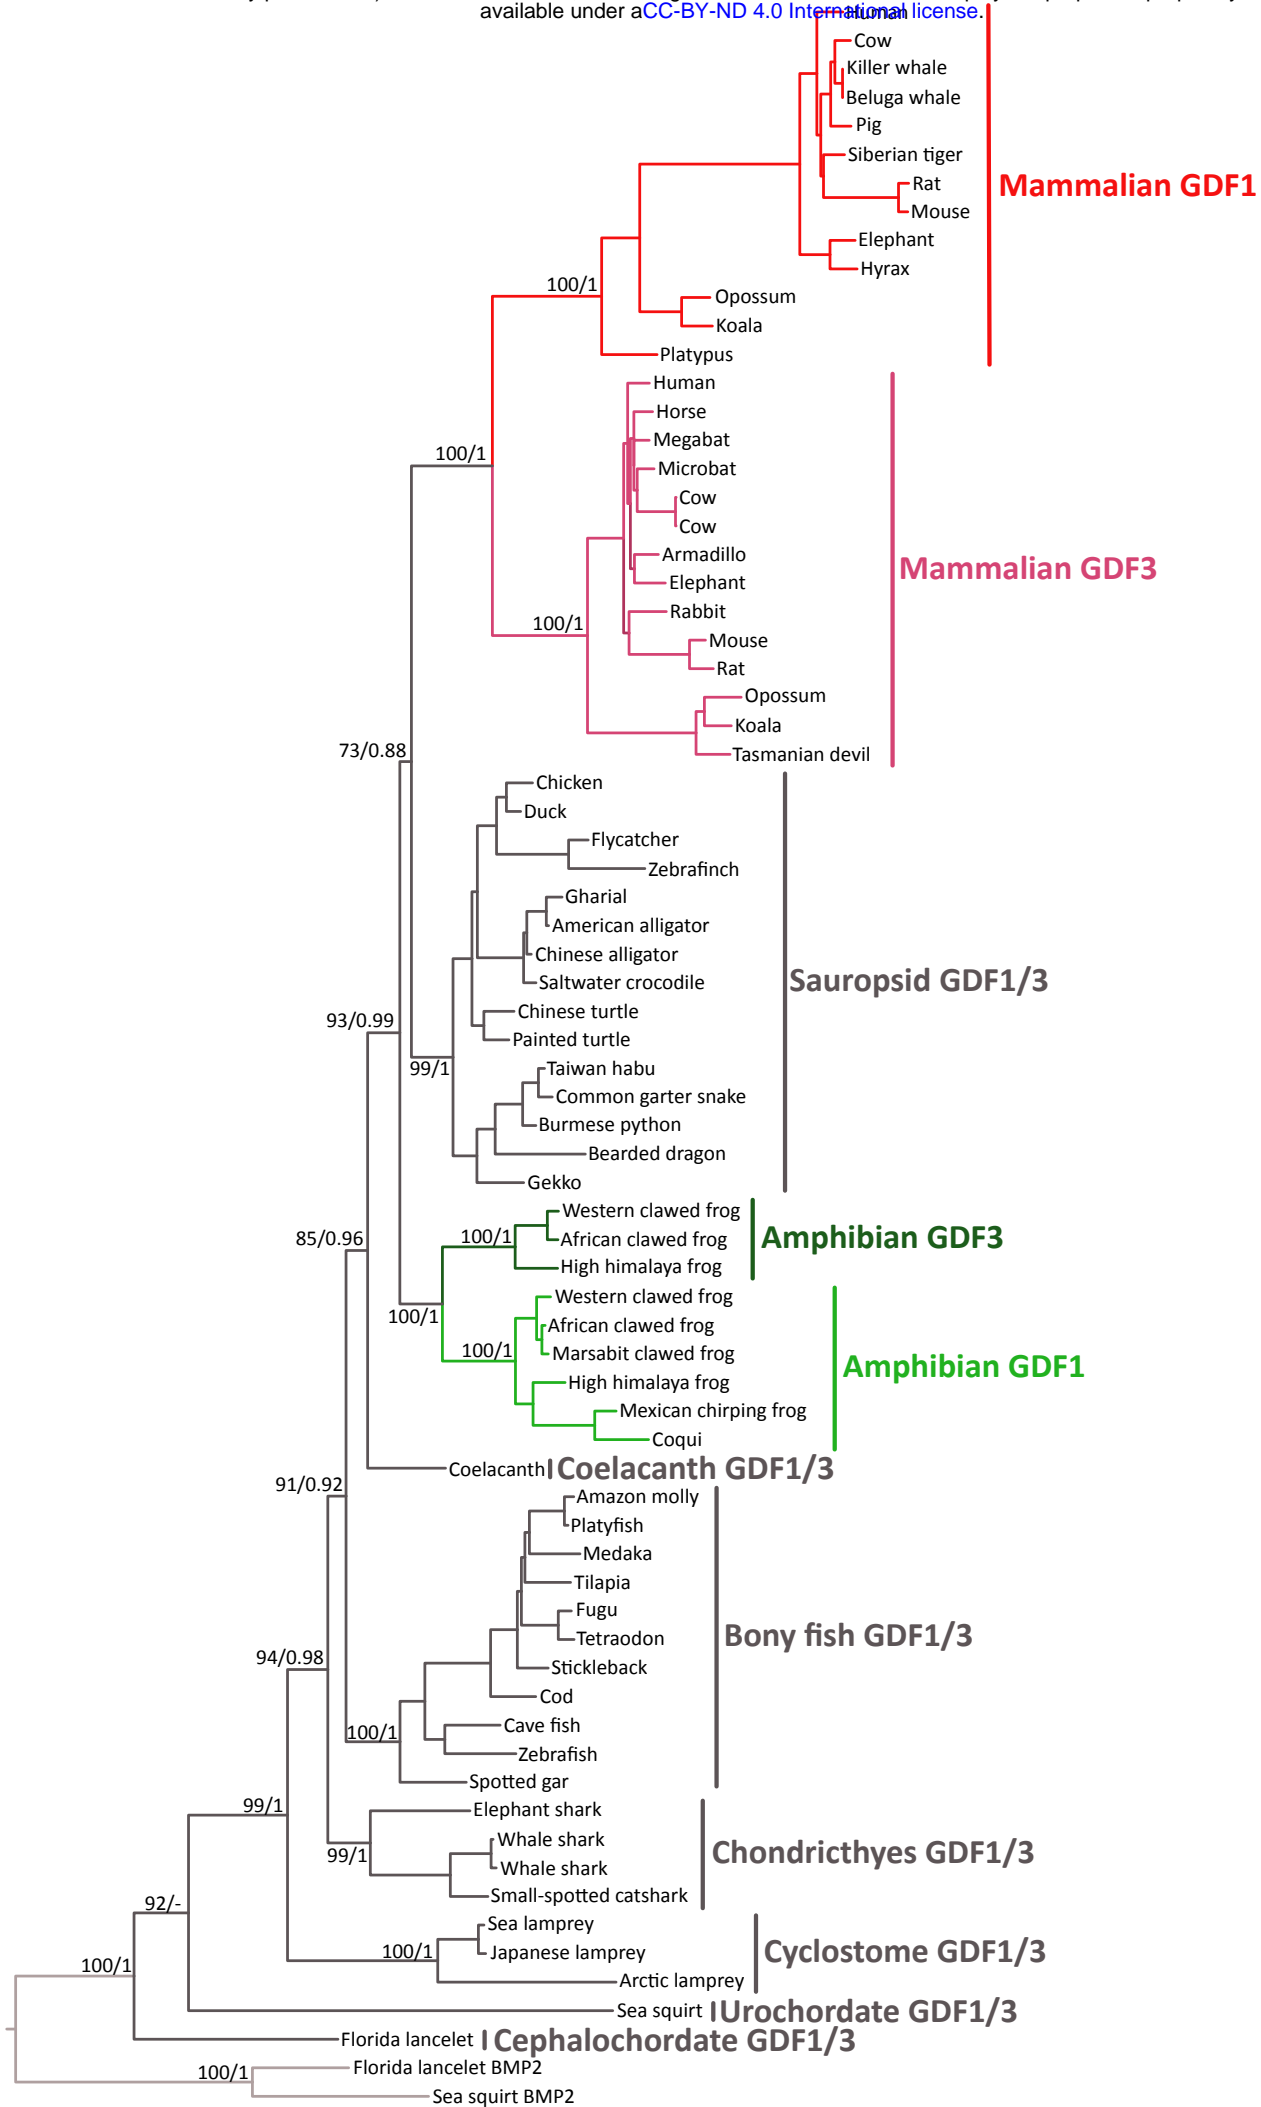

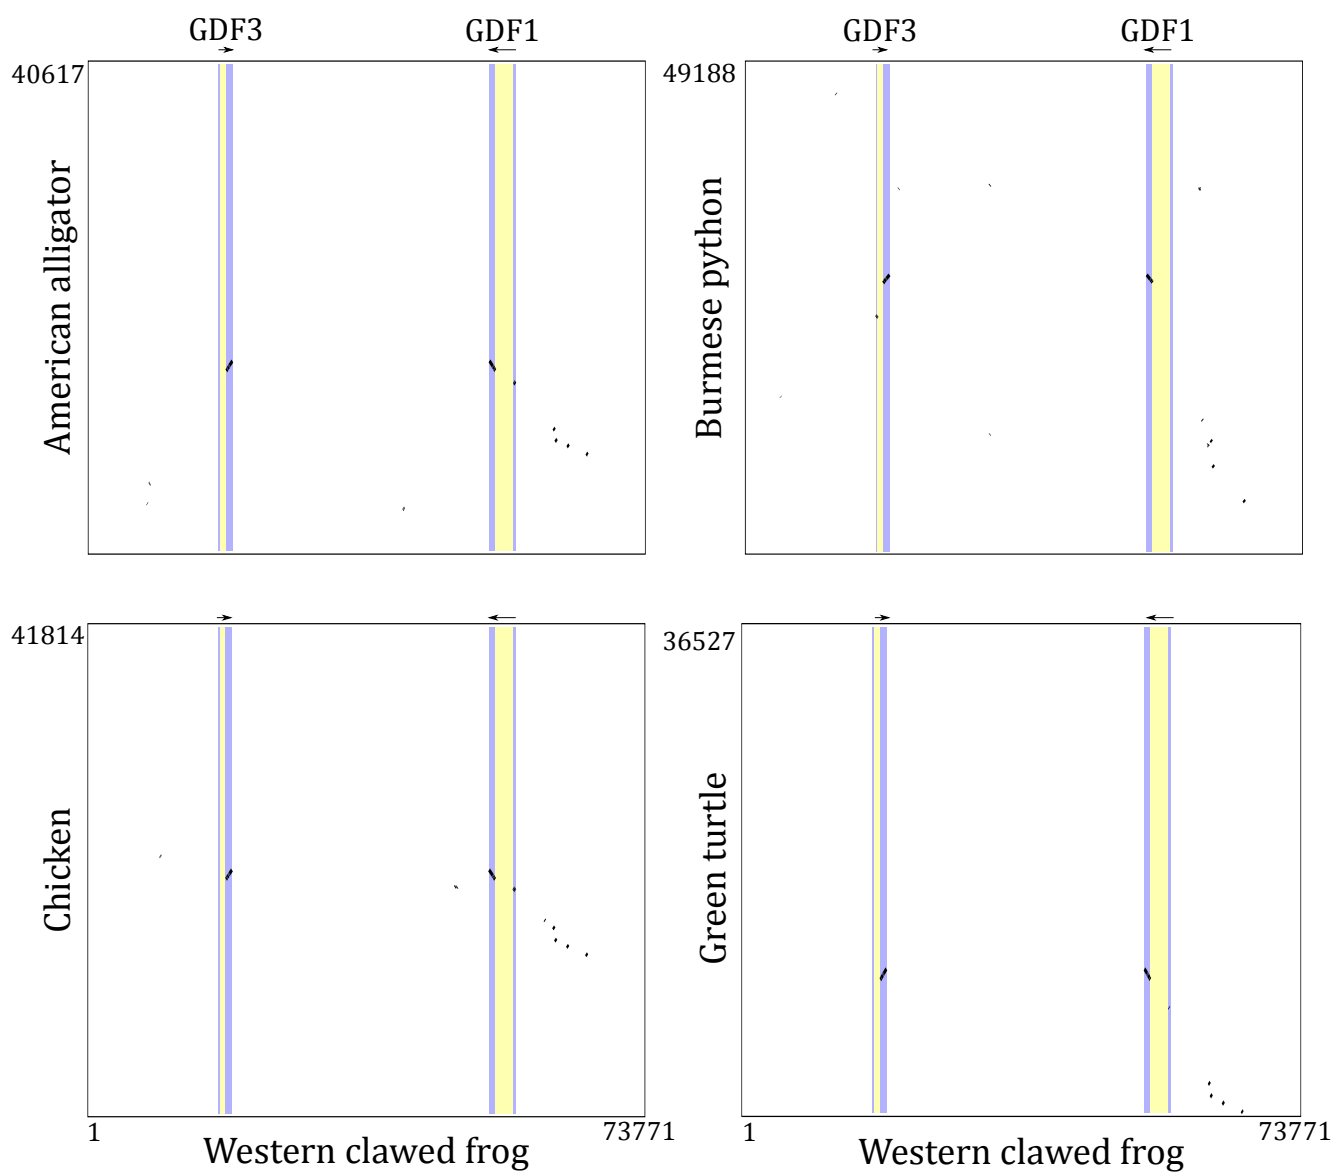

### A) One-duplication model

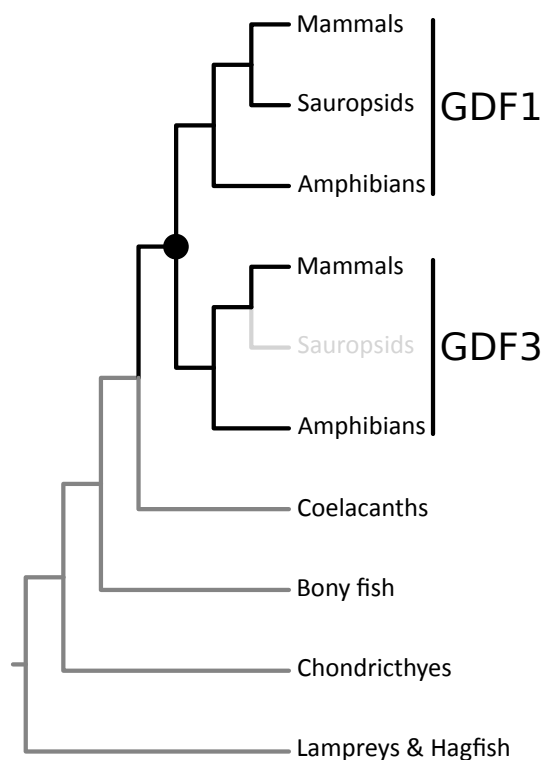

### B) Two-duplication model

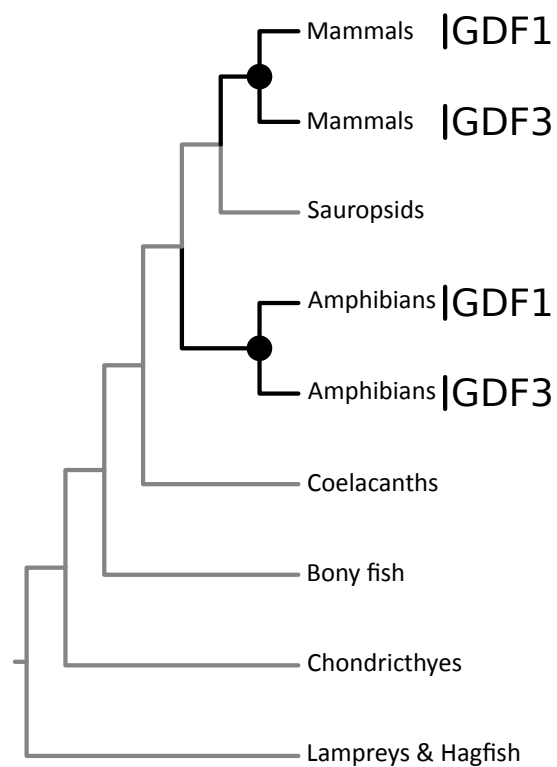

● = gene duplication

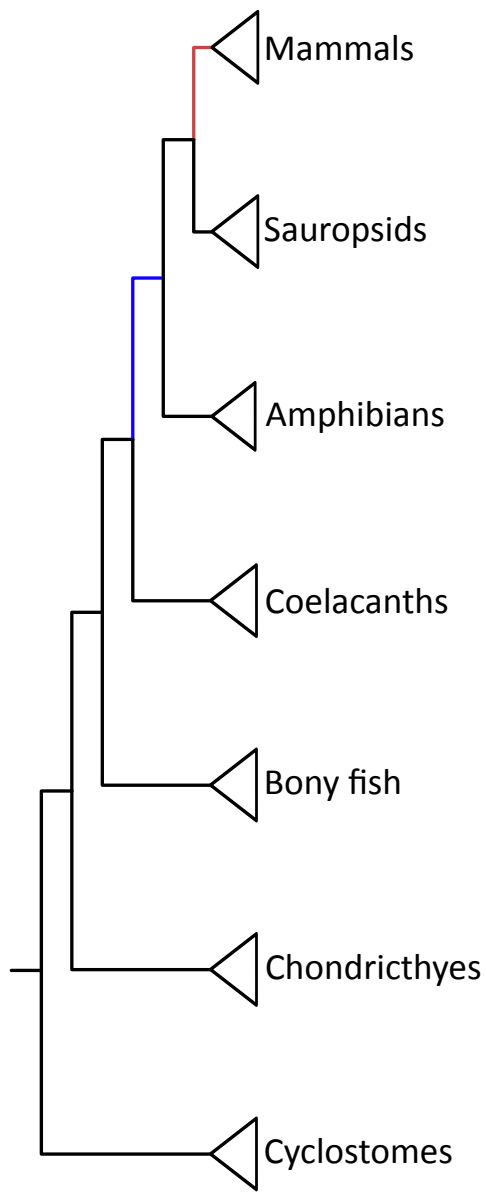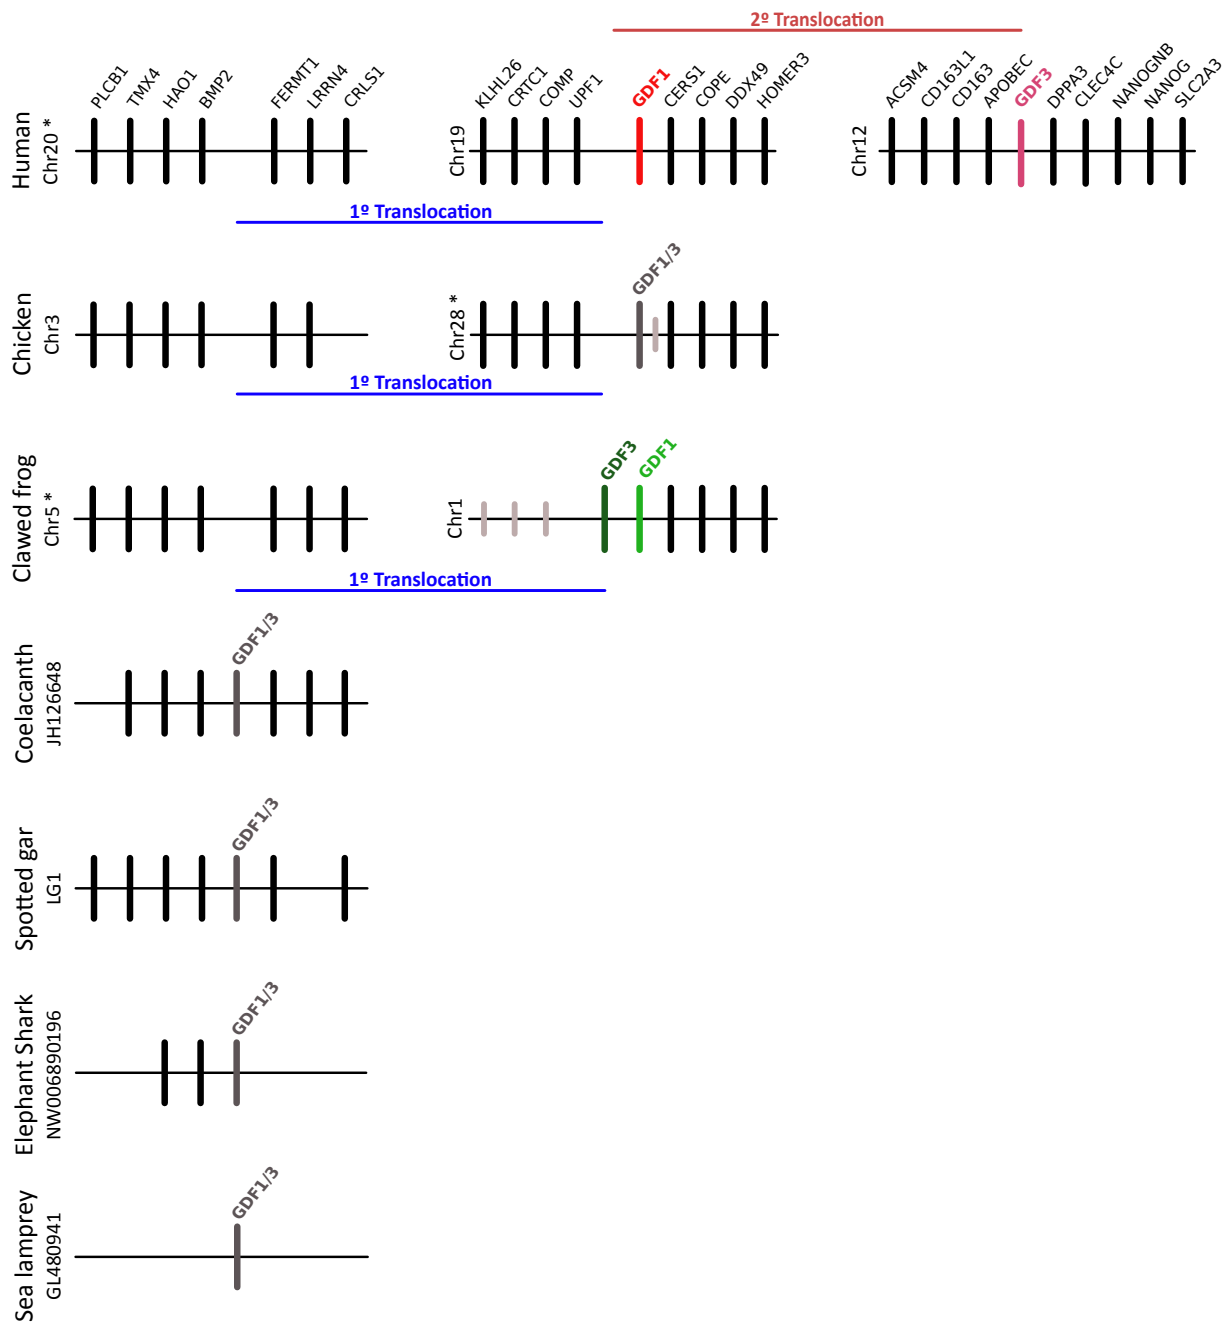

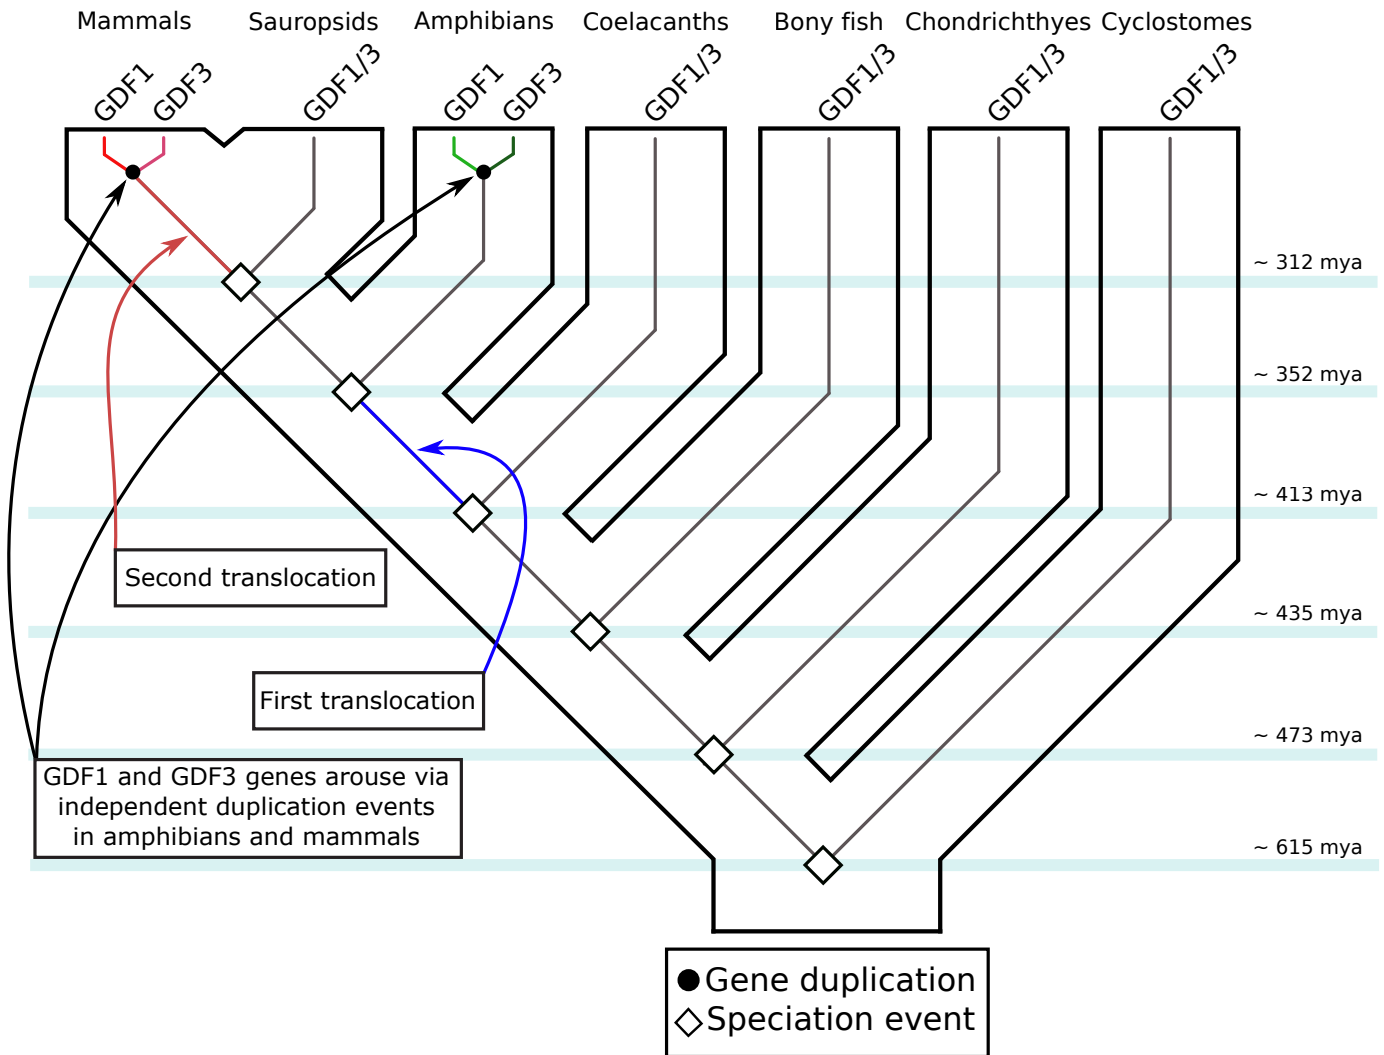

Source: https://www.biorxiv.org/content/10.1101/293522v2.full.pdf
